# Supplementary material for: Highly selective transfer hydrogenation of α,β-unsaturated carbonyl compounds using Cu-based nanocatalysts
Source: Royal Society of Chemistry journal article supplement (doi:10.1039/c7cy00989e), 2017-01-01
Supplement: c7cy00989e1.pdf [file c7cy00989e1.pdf]

## Supporting Information

### Highly selective transfer hydrogenation of $\alpha,\beta$ -unsaturated carbonyl compounds using Cu based nanocatalysts†

Nazia Siddqui,<sup>a</sup> Bipul Sarkar,<sup>a,b</sup> Chandrashekar Pendem,<sup>a</sup> Rubian Khatun<sup>a</sup>, L.N. Sivakumar Konthala,<sup>a</sup> Takehiko Sasaki,<sup>c</sup> Ankur Bordoloi<sup>a</sup> and Rajaram Bal\*<sup>a</sup>

<sup>a</sup> Refinery Technology Division, CSIR- Indian Institute of Petroleum,  
Dehradun-248005, UK, India, E-mail: [raja@iip.res.in](mailto:raja@iip.res.in)

<sup>b</sup> SKKU Advanced Institute of Nano Technology, Sungkyunkwan University,  
Republic of Korea

<sup>c</sup> Department of Complexity Science and Engineering, Graduate School of Frontier Sciences, The University of Tokyo, Kashiwanoha, Kashiwa-shi, Chiba 277-8561, Japan

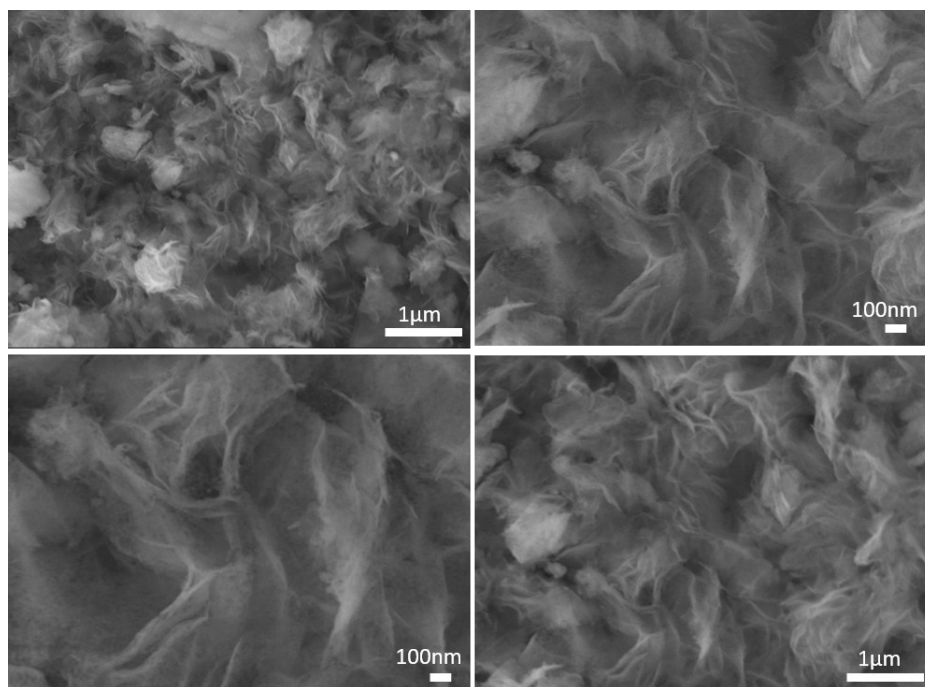

**Figure S1.** SEM Images and of fresh Cu-MgO catalyst.

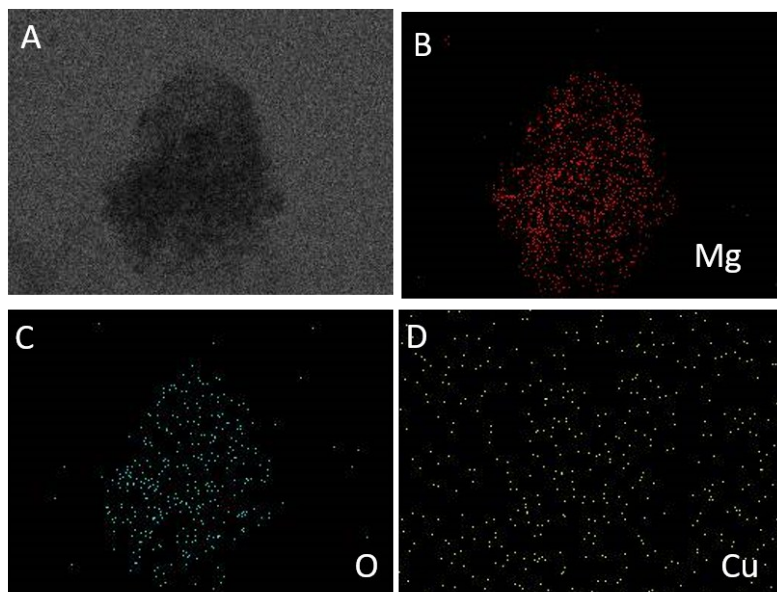

Figure S2. TEM elemental mapping of fresh Cu-MgO.

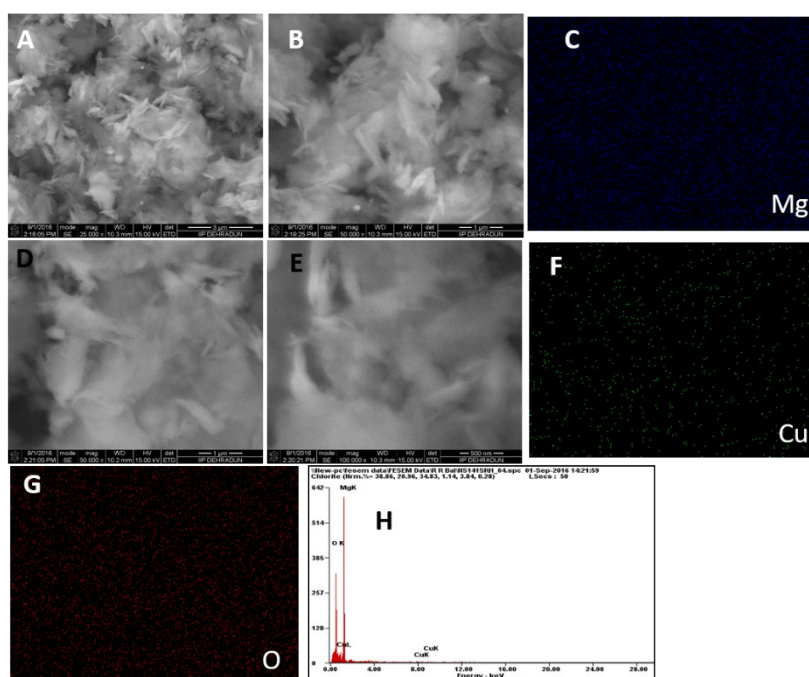

Figure S3. SEM images and elemental mapping of Cu-MgO used catalyst

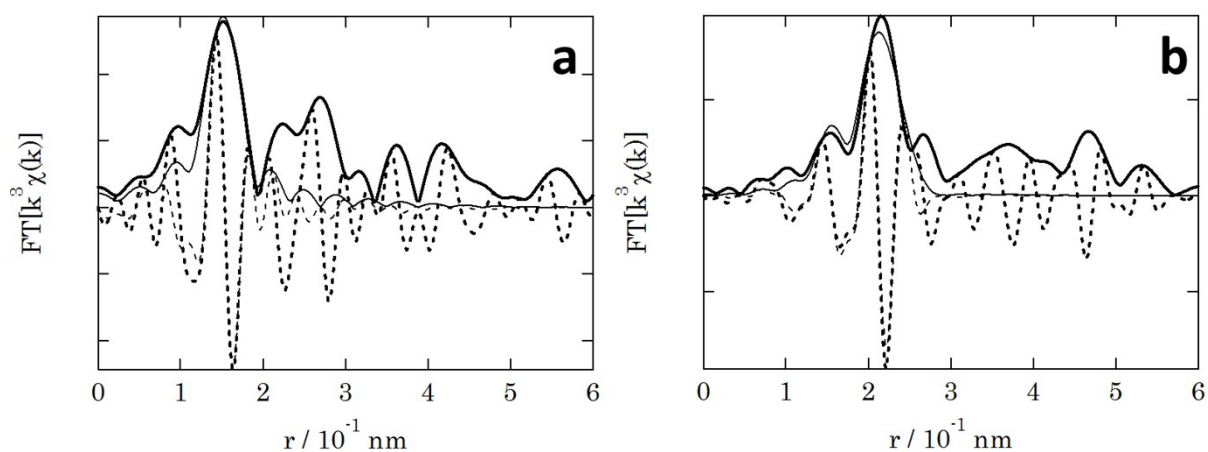

**Figure S4.**  $k^3$ -weighted Fourier transform of Cu-K edge EXAFS for spent 5% Cu-MgO catalyst. Amplitude: solid curves; imaginary part: dotted curves; observed data: thick curves; fitted data: thin curves.

**Table S1.** Activities of hydrogenation of cinnamaldehyde over different catalyst.

| Sl No | Substrate                                                                           | $H_2$ donor                                                                         | Catalyst                   | $\chi_c$ | $\chi_s$                                                                                     |
|-------|-------------------------------------------------------------------------------------|-------------------------------------------------------------------------------------|----------------------------|----------|----------------------------------------------------------------------------------------------|
|       |                                                                                     |                                                                                     |                            |          | C-OH                                                                                         |
| 1     |  |  | MgO <sup>commercial</sup>  | -        | <br>100 |
| 2     |  |  | MgO                        | -        | <br>100 |
| 3     |  |  | CuO <sup>commercial</sup>  | 2.1      | <br>100 |
| 4     |  |  | 5%Cu-MgO <sup>imp</sup>    | 28.4     | <br>100 |
| 5     |  |  | 5%Cu-MgO <sup>co-pre</sup> | 20.9     | <br>100 |
| 6     |  |  | 5%Cu-MgO                   | 97.2     | <br>100 |
| 7     |  |  | 5%Cu-MgO <sup>a</sup>      | 96.7     | <br>100 |

Reaction conditions: 1 g of substrate, 20 ml of cyclohexanol, 0.1 g catalysts, 1 MPa  $N_2$  and 180°C; conversion and product selectivity in mole %;  $\chi_c$ : hydrogenation of cinnamaldehyde;  $\chi_s$ : product selectivity. <sup>a</sup> after 4 reuse.

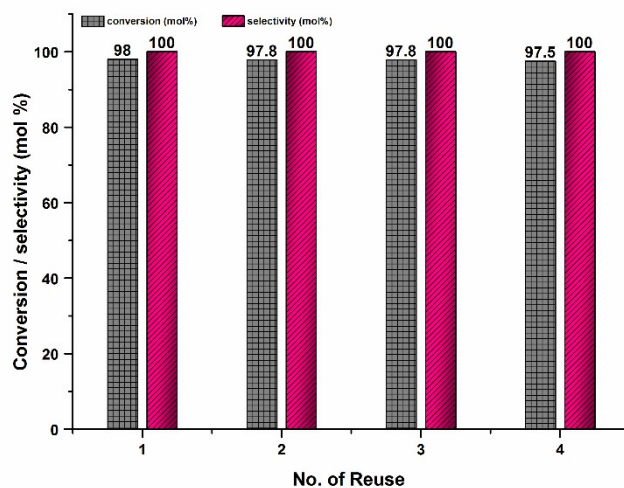

**Figure S5.** Activity data of consecutive runs with the same catalysts (5%Cu-MgO).

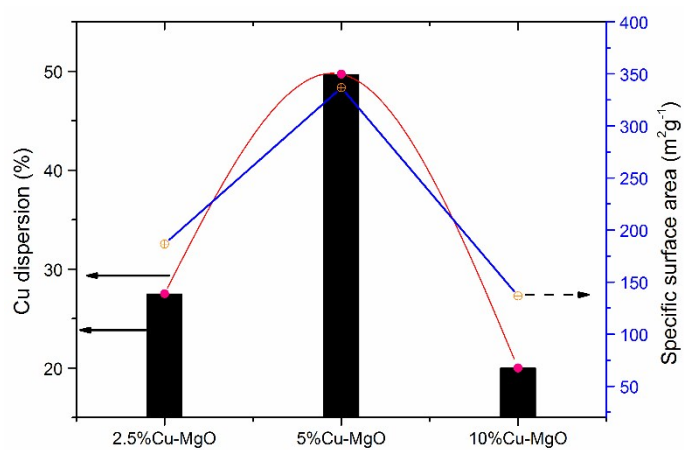

**Figure S6.** Surface area volcano of Cu-MgO catalyst with different Cu loading.

## Metal Dispersion Calculation

Metal dispersion was calculated using the H<sub>2</sub> chemisorption on Micromeritics, Auto Chem II 2920. The formula used is

$$\text{Metal Dispersion} = \frac{S \cdot M \cdot N}{100 \cdot L}$$

Where S is a stoichiometric factor of Cu. That means for example in the case of Cu<sup>2+</sup> and H<sub>2</sub> chemisorption, one molecule of H<sub>2</sub> dissociate to give 2 atoms to be chemisorbed each atom over Cu.

### Detail kinetic calculation given below.

$$t_{1/2} = 0.03r^2/D_p \quad (I)$$

$$t_{1/2} = 0.23r\delta/D_f \times (C_0/C_e) \quad (II)$$

Where

r = Radius of adsorbent in cm

δ = Thickness of water film adhered to the adsorbent in cm (assume = 0.001cm)

D<sub>p</sub> = Pore diffusion coefficient in cm<sup>2</sup>/s

D<sub>f</sub> = Film diffusion coefficient in cm<sup>2</sup>/s

C<sub>0</sub> = Concentration of metals on adsorbent in mg/gm

C<sub>e</sub> = Concentration of metals in solution at equilibrium in mg/l

t<sub>1/2</sub> = time required to bring down the metals concentration to half of initial concentration in seconds.

t<sub>1/2</sub> has been calculated from equation no. (III)

$$\ln \frac{C_0 - C_t}{C_0 - C_e} = -k_1 t \quad (III)$$

To find out the rate limiting step of the overall adsorption the value of first order rate constant

(K<sub>1</sub>) obtained from the slopes of the straight lines of first order model.

$$\ln (C_0 - C_t) = \ln (C_0 - C_e) - k_1 t$$

$$q_t = (C_i - C_t)V/m$$

$$q_e = (C_i - C_e)V/m$$

Where  $C_i$  and  $C_e$  are the initial and equilibrium concentration of cinnamaldehyde, respectively (mg/l),  $V$  is the volume of the solution (l), and  $W$  is the weight of the catalyst used (g).  $q_e$  and  $q_t$  are the amount of cinnamaldehyde adsorbed per gram metal (mg/g) at equilibrium and time  $t$ ,

$K_1$  is the slope of graph

Initial concentration of Cinnamaldehyde = 1g

Density of Cinnamaldehyde = 1.05 gm/ml

Cyclohexanol = 20ml

Total volume = 20ml Cyclohexanol + 1ml Cinnamaldehyde

So cinnamaldehyde concentration =  $(1000 \times 1000) / 21$

$C_i = 47619$  mg/l

| t     | con | Ct       | qt       | ln(qe-qt) |
|-------|-----|----------|----------|-----------|
| 3600  | 6   | 44761.86 | 599.9994 | 9.137769  |
| 10800 | 34  | 31428.58 | 3399.988 | 8.779558  |
| 18000 | 73  | 12857.13 | 7299.993 | 7.863266  |
| 25200 | 97  | 1428.57  | 9699.99  | 5.298316  |
| 28800 | 99  | 476.19   | 9899.99  | #NUM!     |

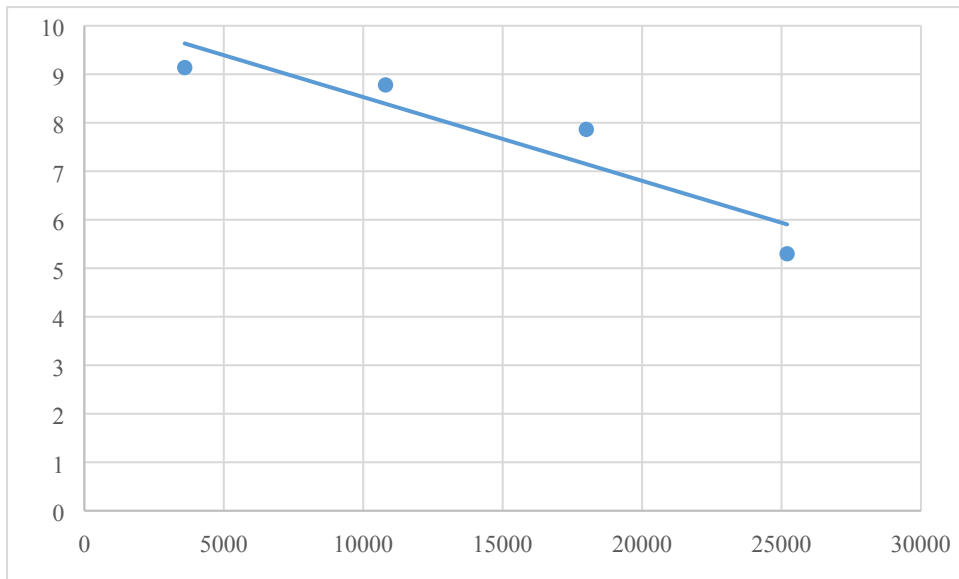

**Fig-S7-** plot of  $\ln(q_e - q_t)$  vs Time.

$$\text{Slop} = -2 \times 10^{-4}$$

$$K_1 = 2 \times 10^{-4}$$

$$t_{1/2} = -[\ln(0.5)] / 2 \times 10^{-4}$$

$$= 3465$$

$$r = 3 \text{ Nm}$$

$$= 3 \times 10^{-7} \text{ cm}$$

$$t_{1/2} = 0.03 r^2 / D_p$$

$$D_p = 0.03 \times (3 \times 10^{-7} \text{ cm})^2 / 3465$$

$$D_p = 7.79 \times 10^{-19}$$

$$t_{1/2} = 0.23 r \delta / D_f \times (C_0 / C_e)$$

$C_0$  = Concentration of metals on adsorbent in mg/gm

$C_e$  = Concentration of metals in solution at equilibrium in mg/l

$$C_e = 476.19$$

$$C_0 = (47619 - 476.19) / (0.021 / 1.1)$$

= 9899.99 mg/gm

$D_f = 0.23 \times 3 \times 10^{-7} \times 0.001 \times 9899.99 / (3465 \times 476.19)$

=  $4.14 \times 10^{-13}$   $\text{Cm}^2/\text{s}$

Here we concluded that  $D_f$  value is very small so this reaction is not a control reaction.

Calculation for activation energy is given below,

At different temperature the values of rate constants were calculated (Fig S7), and Arrhenius plot was used for the calculation of activation energy (Fig-S8). The amount of activation energy was around 8.9 kJ/mol.

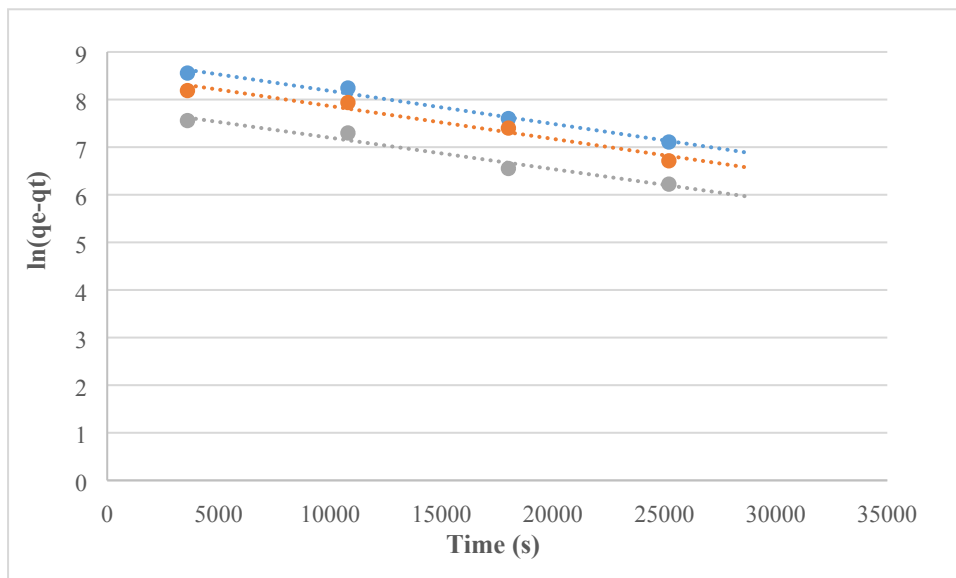

**Fig-S8** Plot of different  $\ln(q_e - q_t)$  vs Time



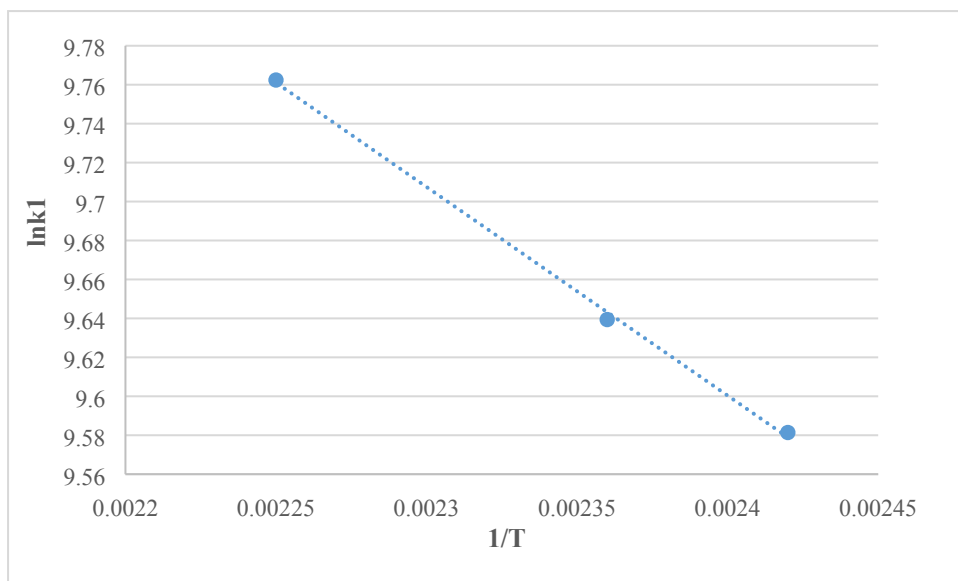

**Fig-S9** Arrhenius plot for transfer hydrogenation reaction.

**TOF Table -S2**

| S.No | Catalysts                          | Reaction condition                         | H <sub>2</sub> Source     | Selectivity of Unsaturated alcohol (%) | TOF (h <sup>-1</sup> ) | Ref.         | Remark                                                          |
|------|------------------------------------|--------------------------------------------|---------------------------|----------------------------------------|------------------------|--------------|-----------------------------------------------------------------|
| 1    | 2% Pt/CeO <sub>2</sub>             | 50°C, 2h, 20 MPa                           | 2-propanol                | 83.5%                                  | 7.3                    | <sup>1</sup> | Expansive metal used                                            |
| 2    | 0.75% Pd-WN/SBA-15                 | 40°C, 2h, 1.0 MPa                          | IPA+10 bar H <sub>2</sub> | 0.7                                    | 757                    | <sup>2</sup> | Selectivity of Cinnamyl alcohol is low and Expansive metal used |
| 3    | K <sub>3</sub> PO <sub>4</sub>     | 80°C, 6h, 2.0 MPa                          | 2-Propanol                | 100                                    | .254                   | <sup>3</sup> | TOF is very low                                                 |
| 4    | Co <sub>3</sub> O <sub>4</sub> /MC | 120°C, 50h, 2.0 MPa                        | 2-Propanol                | 100                                    | 1.179                  | <sup>4</sup> | TOF is very low                                                 |
| 5    | Au/SiC                             | visible light irradiation at 20°C, 130min. | 2-Propanol                | 100                                    | 487                    | <sup>5</sup> | Expansive metal used                                            |
| 7    | Ag/Uio-66                          | 140°C, 6h, 5.0 MPa                         | H <sub>2</sub>            | 66                                     | 3.3                    | <sup>6</sup> | Expansive metal used as well as TOF is less                     |
| 8    | (1 : 1) Cu(O)-Ni(O)-               | 80°C, 1h,                                  | H <sub>2</sub>            | 59.6                                   | 10.1                   | <sup>7</sup> | Selectivity of                                                  |

|           |                                       |                   |                     |            |              |               |                                                                                       |
|-----------|---------------------------------------|-------------------|---------------------|------------|--------------|---------------|---------------------------------------------------------------------------------------|
|           | AAPTMS@GO                             |                   |                     |            |              |               | Cinnamyl alcohol is low TOF is less                                                   |
| 9         | PdNP@PPH2-PEGPIILP                    | 60°C, 2h, 2.0 MPa | H <sub>2</sub>      | 0          | 200          | <sup>8</sup>  | Selectivity of Cinnamyl alcohol is very low Expansive metal used                      |
| 110       | Pd <sup>0</sup> -AmP-MCF              | 20°C, 0.5h, 1atm  | H <sub>2</sub>      | 14         | 47           | <sup>9</sup>  | Selectivity of Cinnamyl alcohol is very low and Expansive metal used                  |
| 11        | Ir-NbO <sub>x</sub> /SiO <sub>2</sub> | 100°C,            | H <sub>2</sub>      | 96         | 25.1         | <sup>10</sup> | Expensive metal used and H <sub>2</sub> used                                          |
| 12        | Ir-MoO <sub>x</sub> /SiO <sub>2</sub> | 30°C, 0.8M Pa     | H <sub>2</sub>      | 90         | 217          | <sup>11</sup> | Expensive metal used and H <sub>2</sub> used                                          |
| 13        | Ir-ReO <sub>x</sub> /SiO <sub>2</sub> | 30°C, 0.8M Pa.1h  | H <sub>2</sub>      | 95         | 12600        | <sup>12</sup> | Expensive metal used and H <sub>2</sub> used                                          |
| 14        | AuIr/TiO <sub>2</sub>                 | 100°C, 2.0 MPa.1h | H <sub>2</sub>      | 83.4       | 17.7         | <sup>13</sup> | Expensive metal used and H <sub>2</sub> used                                          |
| 15        | Pt-Fe/LDH                             | 60°C, 2.0 MPa.2h  | H <sub>2</sub>      | 51         | 10.8         | <sup>14</sup> | Expensive metal used and H <sub>2</sub> used. Selectivity of Cinnamyl alcohol is less |
| 16        | Ni-OA@SiO <sub>2</sub>                | 60°C, 4.0 bar.    | H <sub>2</sub>      | 99         | 2.8          | <sup>15</sup> | TOF is low                                                                            |
| <b>17</b> | <b>This work/5%Cu/MgO</b>             | -                 | <b>Cyclohexanol</b> | <b>100</b> | <b>13.31</b> |               |                                                                                       |

## References

1. C. M. Piqueras, V. Puccia, D. A. Vega and M. A. Volpe, *Applied Catalysis B: Environmental*, 2016, 185, 265-271.
2. D. Wang, Y. Zhu, C. Tian, L. Wang, W. Zhou, Y. Dong, H. Yan and H. Fu, *ChemCatChem*, 2016, 8, 1718-1726.
3. R. Radhakrishnan, D. M. Do, S. Jaenicke, Y. Sasson and G.-K. Chuah, *ACS Catalysis*, 2011, 1, 1631-1636.
4. G. H. Wang, X. Deng, D. Gu, K. Chen, H. Tuysuz, B. Spliethoff, H. J. Bongard, C. Weidenthaler, W. Schmidt and F. Schuth, *Angewandte Chemie*, 2016, 55, 11101-11105.

5. C.-H. Hao, X.-N. Guo, Y.-T. Pan, S. Chen, Z.-F. Jiao, H. Yang and X.-Y. Guo, *Journal of the American Chemical Society*, 2016, 138, 9361-9364.
6. E. Plessers, D. E. De Vos and M. B. J. Roeloffs, *Journal of Catalysis*, 2016, 340, 136-143.
7. S. Rana and S. B. Jonnalagadda, *RSC Adv.*, 2017, 7, 2869-2879.
8. S. Doherty, J. G. Knight, T. Backhouse, E. Abood, H. Alshaikh, I. J. S. Fairlamb, R. A. Bourne, T. W. Chamberlain and R. Stones, *Green Chem.*, 2017, 19, 1635-1641.
9. A. Nagendiran, V. Pascanu, A. Bermejo Gomez, G. Gonzalez Miera, C. W. Tai, O. Verho, B. Martin-Matute and J. E. Backvall, *Chemistry*, 2016, 22, 7184-7189.
10. M. Tamura, K. Tokonami, Y. Nakagawa and K. Tomishige, *ACS Sustainable Chemistry & Engineering*, 2017, 5, 3685-3697.
11. M. Tamura, K. Tokonami, Y. Nakagawa and K. Tomishige, *ACS Catalysis*, 2016, 6, 3600-3609.
12. M. Tamura, K. Tokonami, Y. Nakagawa and K. Tomishige, *Chemical communications*, 2013, 49, 7034-7036.
13. J. Zhao, J. Ni, J. Xu, J. Xu, J. Cen and X. Li, *Catalysis Communications*, 2014, 54, 72-76.
14. Z. Tian, Q. Li, J. Hou, Y. Li and S. Ai, *Catalysis Science & Technology*, 2016, 6, 703-707.
15. L. Zaramello, B. L. Albuquerque, J. B. Domingos and K. Philippot, *Dalton transactions*, 2017, 46, 5082-5090.
